# Supplementary material for: Elucidating Sequence and Structural Determinants of Carbohydrate Esterases for Complete Deacetylation of Substituted Xylans
Source: MDPI journal article supplement (doi:10.3390/molecules27092655), 2022-04-20
Supplement: s1 [file s1]

# **Elucidating sequence and structural determinants of complete deacetylation of substituted xylans**

**Leena Penttinen <sup>1</sup>, Vera Kouhi <sup>2</sup>, Régis Fauré <sup>3</sup>, Tatiana Skarina<sup>4</sup>, Peter Stogios <sup>4</sup>, Emma Master <sup>4,5</sup>, and  
Edita Jurak <sup>6,\*</sup>**

Supplementary material

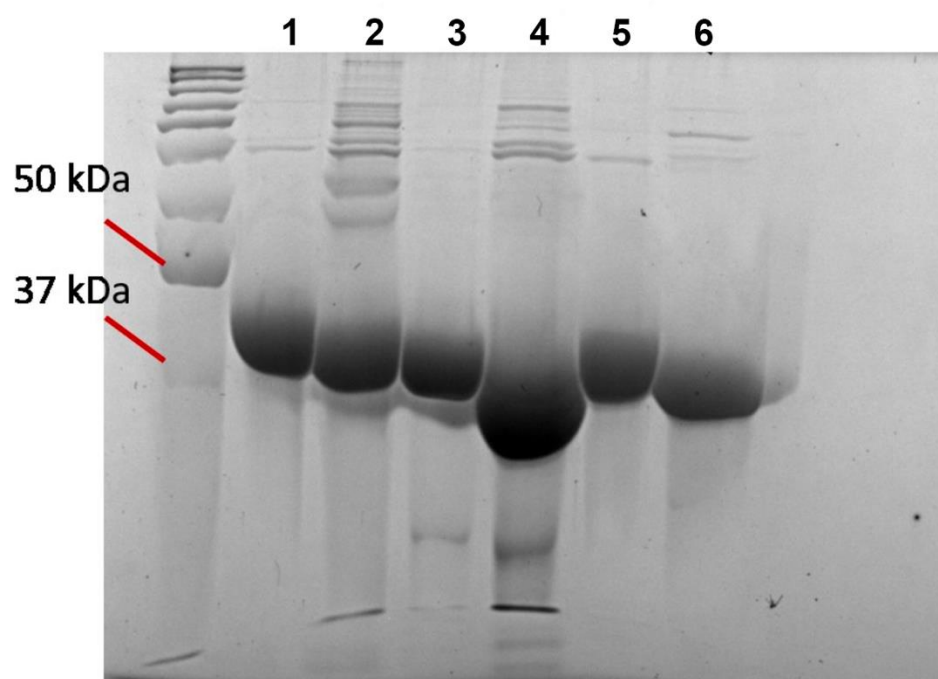

**Figure S1.** Studied acetyl xylan esterases (AcXE) on SDS-PAGE. Sample 1: *Fsp*AcXE, 2: *Fsp*F52AcXE, 3: *Csp*AcXE, 4: *Pbe*AcXE, 5: *Fre*AcXE, 6: *Aim*AcXE.

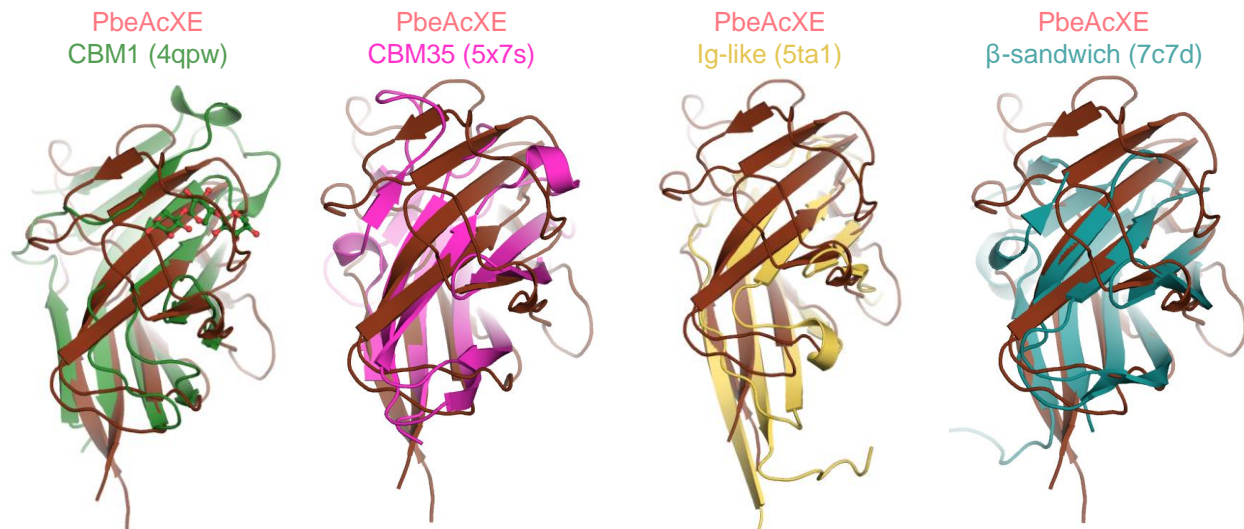

**Figure S2.** A crystal structure of the CBM domain of *PbeAcXE* superimposed with a CBM1 domain from GH10 enzyme from *Bacteroides intestinalis* (PDB ID 4qpw), CBM35 from a GH31 enzyme from *Paenibacillus sp. 598K* (PDB ID 5x7s), and the Ig-like domain from a GH86 enzyme from *Bacteroides uniformis* (PDB ID 5ta1) and the  $\beta$ -sandwich domain from a GH87 enzyme from *Streptomyces thermodiastaticus* (PDB ID 7c7d).

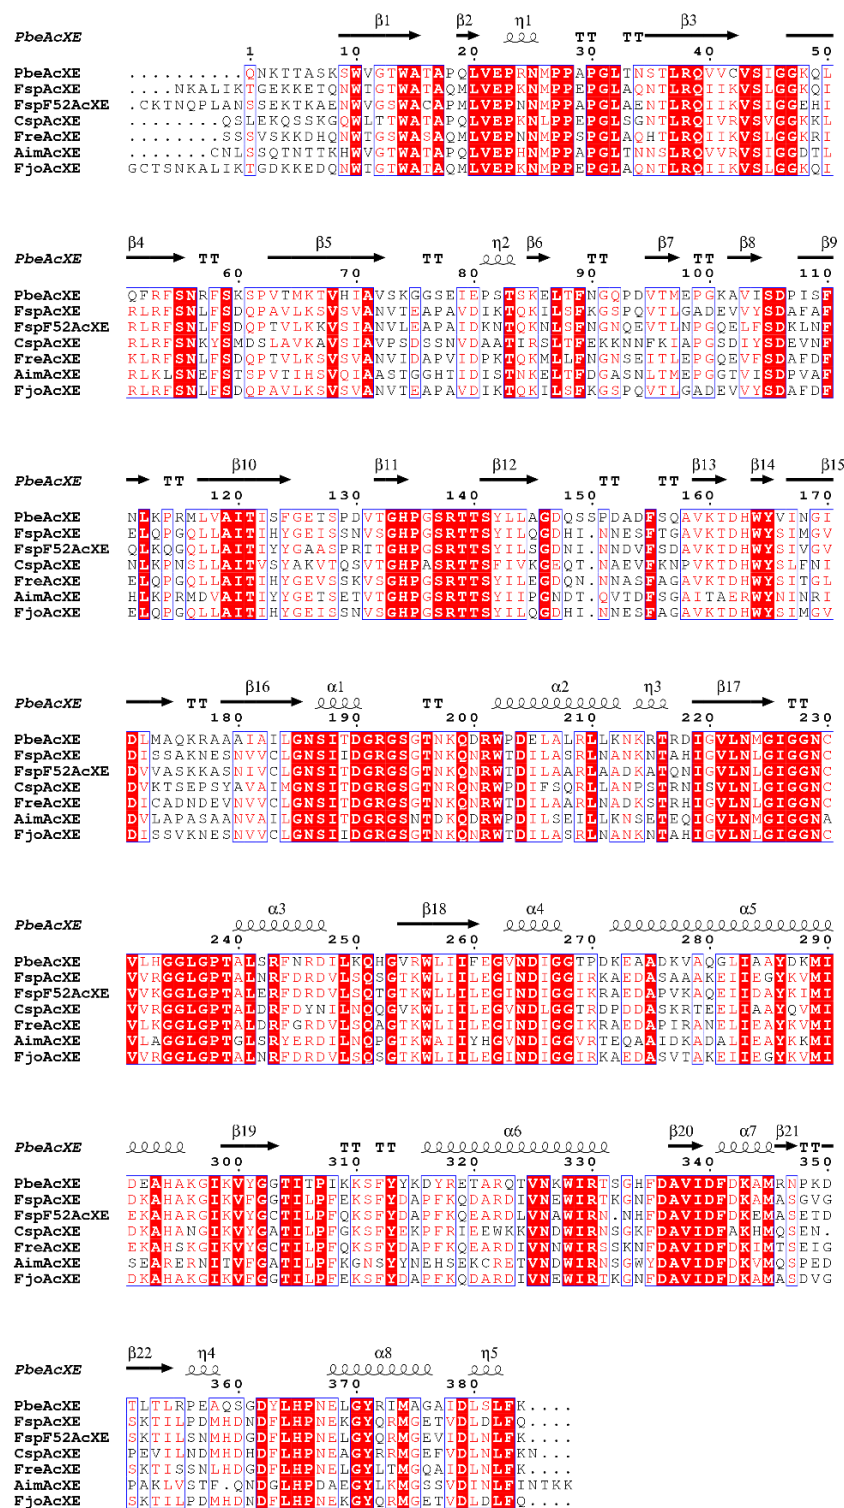

**Figure S3.** Sequence alignment of the studied acetyl xylan esterases (AcXE) and AcXE from *Flavobacterium johnsoniae* UW101 (*FjoAcXE*). Figure is prepared with ESPript. 3.0 server.

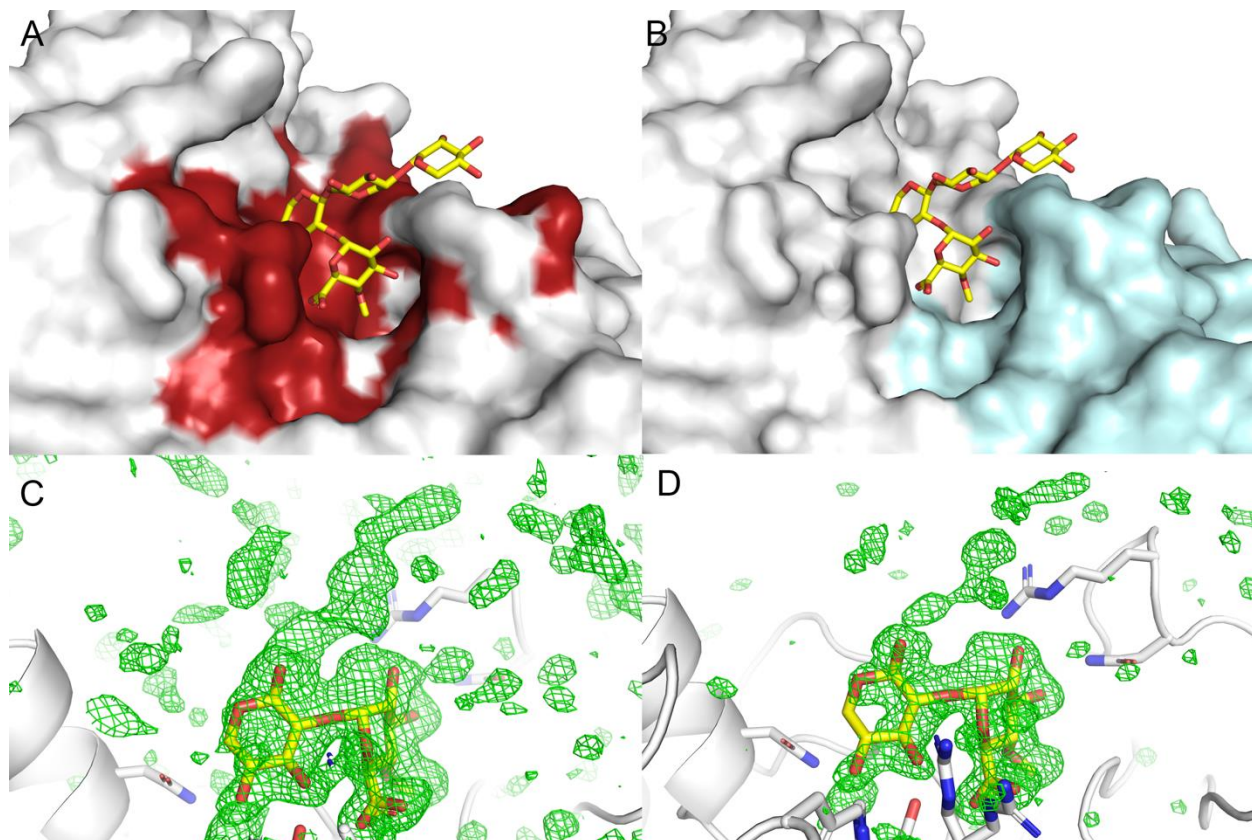

**Figure S4.** Surface representation of a complex structure of *Prolixibacter bellariivorans* acetyl xylan esterase with U<sup>4m2</sup>XX, MeGlcA-(1→2)-Xylp(1→4)-Xylp-(1→4)-Xylp. A) The conserved residues near the active site are shown in red. B) The catalytic SGHN domain is shown in grey and the CBM domain in pale blue. C) Positive F<sub>o</sub>-F<sub>c</sub> electron density in the complex structure after removing the ligand is shown at 2σ contour level in green. D) The same positive F<sub>o</sub>-F<sub>c</sub> electron density is shown at 1σ contour level.

**Table S1.** The six selected *Fjo*AcXE-homologues.

|                                           |                                   |                                          |                                                 |                                                          |                                                          |                                                                                 |
|-------------------------------------------|-----------------------------------|------------------------------------------|-------------------------------------------------|----------------------------------------------------------|----------------------------------------------------------|---------------------------------------------------------------------------------|
| PULDB<br>ID                               | K392DRAFT_2<br>214                | FF52_18088                               | EW79DRAFT<br>T_2436                             | T426DRAFT<br>_00687                                      | WP_0356833<br>15.1                                       | AlkimDRAFT<br>T_0871                                                            |
| Protein<br>name                           | <i>Fsp</i> AcXE                   | <i>Fsp</i> F52AcXE                       | <i>Csp</i> AcXE                                 | <i>Pbe</i> AcXE                                          | <i>Fre</i> AcXE                                          | <i>Aim</i> AcXE                                                                 |
| GenBank<br>ID                             | WP_073411463<br>.1                | WP_0084678<br>35.1.                      | WP_0474231<br>82.1                              | WP_0275861<br>61.1                                       | WP_0356833<br>15.1                                       | WP_0441177<br>39.1                                                              |
| Species                                   | <i>Flavobacterium</i><br>sp. 40S8 | <i>Flavobacteri</i><br><i>um</i> sp. F52 | <i>Chryseobacte</i><br><i>rium</i> sp.<br>YR480 | <i>Prolixibacter</i><br><i>bellariivoran</i><br><i>s</i> | <i>Flavobacteri</i><br><i>um</i><br><i>reichenbachii</i> | <i>Alkaliflexus</i><br><i>imshenetskii</i><br>DSM 15055<br>AlkimDRAFT<br>T_0871 |
| Identity<br>with<br><i>Fjo</i> AcXE,<br>% | 98.1                              | 69.4                                     | 53.3                                            | 51.6                                                     | 73.9                                                     | 47                                                                              |
| Molecular<br>mass, kDa                    | 42.3                              | 42.8                                     | 42.8                                            | 41.9                                                     | 42.0                                                     | 42.2                                                                            |
| Theoretical<br>pI                         | 6.7                               | 6.7                                      | 9.0                                             | 9.4                                                      | 6.3                                                      | 5.3                                                                             |
| Signal<br>sequence                        | +                                 | +                                        | +                                               | +                                                        | +                                                        | +                                                                               |
| Yield (mg)                                | 40                                | 9.2                                      | 12                                              | 8                                                        | 8.3                                                      | 14                                                                              |

Molecular mass and theoretical pI were calculated with ProtParam Tool

(<http://web.expasy.org/protparam/>).

**Table S2.** Substrates used in this study.

| Substrate name                                                                        | IUPAC name                                                      | Producer      | Activity detection method |
|---------------------------------------------------------------------------------------|-----------------------------------------------------------------|---------------|---------------------------|
| Wheat arabinoxylan<br>(medium viscosity)                                              | Arabinoxylan (1,2;1,3- $\alpha$ -Araf)                          | Megazyme      | PAHBAH assay              |
| Arabinoglucuronoxylan<br>(oat spelt water soluble<br>part separated after<br>boiling) | Arabinoglucuronoxylan                                           | Sigma-Aldrich | PAHBAH assay              |
| CM-Cellulose 4M<br>(medium viscosity)                                                 | Cellulose                                                       | Megazyme      | PAHBAH assay              |
| Galacto-xyloglucan<br>(Tamarind, high<br>viscosity)                                   | Galacto-xyloglucan                                              | Megazyme      | PAHBAH assay              |
| Lichenan<br>(Icelandic moss)                                                          | Glucan (1,3; 1,4- $\beta$ -D-)                                  | Megazyme      | PAHBAH assay              |
| Pullulan                                                                              | Glucan (1,4; 1,6- $\alpha$ -D-)                                 | Megazyme      | PAHBAH assay              |
| Dextran                                                                               | Glucan (1,6- $\alpha$ -D-)                                      | Megazyme      | PAHBAH assay              |
| Glucomannan Konjac<br>(low viscosity)                                                 | Glucomannan, acetylated                                         | Megazyme      | PAHBAH assay              |
| Mannan                                                                                | Mannan (1,4- $\beta$ -D-)                                       | Megazyme      | PAHBAH assay              |
| Arabinan<br>(sugar beet)                                                              | Pectin (1,5- $\alpha$ -L-Araf)                                  | Megazyme      | PAHBAH assay              |
| Arabinogalactan<br>(Larch wood)                                                       | Pectin (1,3;1,4;1,6- $\beta$ -D-Gal; 1,4;1,6- $\alpha$ -L-Araf) | Megazyme      | PAHBAH assay              |
| Pectic galactan<br>(Lupin)                                                            | Pectin (Galactan (1,4- $\beta$ -D))                             | Megazyme      | PAHBAH assay              |

|                                          |                                                                                          |                         |                    |
|------------------------------------------|------------------------------------------------------------------------------------------|-------------------------|--------------------|
| Galactan<br>(Lupin)                      | Pectin (Galactan (1,4- $\beta$ -D-)); Arabinofuranosidase treated lupin pectic galactan) | Megazyme                | PAHBAH assay       |
| Rhamnogalacturonan (soy bean)            | Rhamnogalacturon                                                                         | Megazyme                | PAHBAH assay       |
| Rhamnogalacturonan I (potato)            | Rhamnogalacturonan I                                                                     | Megazyme                | PAHBAH assay       |
| Glucuronoxylan                           | Glucuronoxylan                                                                           | Megazyme                | PAHBAH assay       |
| <i>p</i> NP-arabinofuranoside            | 4-Nitrophenyl $\alpha$ -L-arabinofuranoside                                              | Sigma-Aldrich Inc., USA | <i>p</i> NP-assay  |
| <i>p</i> NP-glucopyranoside              | 4-Nitrophenyl $\beta$ -D-glucopyranoside                                                 | Sigma-Aldrich Inc., USA | <i>p</i> NP-assay  |
| <i>p</i> NP-mannopyranoside              | 4-Nitrophenyl $\beta$ -D-mannopyranoside                                                 | Sigma-Aldrich Inc., USA | <i>p</i> NP-assay  |
| <i>p</i> NP-xylopyranoside               | 4-Nitrophenyl $\beta$ -D-xylopyranoside                                                  | Sigma-Aldrich Inc., USA | <i>p</i> NP-assay  |
| <i>p</i> NP-chitobioside                 | 4-Nitrophenyl <i>N,N'</i> -diacetyl- $\beta$ -chitobioside                               | Sigma-Aldrich Inc., USA | <i>p</i> NP-assay  |
| <i>p</i> NP- $\alpha$ -galactopyranoside | 4-Nitrophenyl $\alpha$ -D-galactopyranoside                                              | Sigma-Aldrich Inc., USA | <i>p</i> NP-assay  |
| <i>p</i> NP-fucopyranoside               | 4-Nitrophenyl- $\alpha$ -L-fucopyranoside                                                | Sigma-Aldrich Inc., USA | <i>p</i> NP-assay  |
| <i>p</i> NP- $\beta$ -galactopyranoside  | 4-Nitrophenyl $\beta$ -D-galactopyranoside                                               | Sigma-Aldrich Inc., USA | <i>p</i> NP-assay  |
| <i>p</i> NP-acetate                      | 4-Nitrophenyl acetate                                                                    | Sigma-Aldrich Inc., USA | <i>p</i> NP-assay, |



|                                                               |                                                          |                                                                                                                                       |                                                                                |
|---------------------------------------------------------------|----------------------------------------------------------|---------------------------------------------------------------------------------------------------------------------------------------|--------------------------------------------------------------------------------|
|                                                               |                                                          |                                                                                                                                       | Minimal enzyme concentration assay;<br>pH optimum assay                        |
| 4-MU-acetate                                                  | 4-Methylumbelliferyl acetate                             | Sigma-Aldrich Inc., USA                                                                                                               | 4-MU-acetate-assay,<br>Minimal enzyme concentration assay;<br>pH optimum assay |
| Acetylated and feruloylated corn xylooligosaccharade (CF-XOS) |                                                          | Mild acid hydrolysis of corn fiber, received as a gift from prof. Mirjam Kabel (University of Wageningen, The Netherlands)            | Secondary screen                                                               |
| Acetylated glucurono-xylooligosaccharides                     |                                                          | steam extraction of milled chips from Eucalyptus wood, received as a gift from prof. Maija Tenkanen (University of Helsinki, Finland) | Secondary screen                                                               |
| Xylooligosaccharide mixture                                   | Per- <i>O</i> -acetylated xylo-oligosaccharides (DP 4-7) | TBI, France                                                                                                                           | Secondary screen                                                               |

**Table S3.** The pH optimum of *Fjo*AcXE homologs was evaluated by measuring enzyme activity on ?? mM 4-MUA after 30 minutes at 40°C between pH 3.5 – 9.0.

|                    | pH 3.5 | pH 4.5 | pH 5.5 | pH 6.0 | pH 6.5 | pH 7.0 | pH 7.5 | pH 8.0 | pH 9.0 |
|--------------------|--------|--------|--------|--------|--------|--------|--------|--------|--------|
| <i>Fsp</i> AcXE    | 4%     | 26%    | 63%    | 94%    | 100%   | 93%    | 87%    | 44%    | 6%     |
| <i>Fsp</i> F52AcXE | 13%    | 45%    | 52%    | 86%    | 85%    | 72%    | 100%   | 89%    | 0%     |
| <i>Csp</i> AcXE    | 2%     | 13%    | 37%    | 59%    | 100%   | 85%    | 70%    | 50%    | 0%     |
| <i>Pbe</i> AcXE    | 26%    | 42%    | 67%    | 86%    | 54%    | 100%   | 88%    | 34%    | 0%     |
| <i>Fre</i> AcXE    | 4%     | 37%    | 85%    | 88%    | 89%    | 100%   | 96%    | 52%    | 0%     |
| <i>Aim</i> AcXE    | 9%     | 46%    | 86%    | 83%    | 65%    | 87%    | 100%   | 85%    | 39%    |

**Table S4.** The temperature optimum of *Fjo*AcXE homologs was evaluated by measuring enzyme activity on ?? mM 4-MUA after 24 hours at 20, 40, 55 and 70°C and the optimum pH of the enzyme.

| 20°C               | 0 min | 30 min | 1 h   | 2 h   | 4 h   | 6 h  | 24 h  |
|--------------------|-------|--------|-------|-------|-------|------|-------|
| <i>Fsp</i> AcXE    | 81 %  | 100 %  | 77 %  | 65 %  | 70 %  | 98 % | 24 %  |
| <i>Fsp</i> F52AcXE | 91 %  | 100 %  | 78 %  | 55 %  | 55 %  | 67 % | 32 %  |
| <i>Csp</i> AcXE    | 100 % | 83 %   | 109 % | 100 % | 111 % | 66 % | 96 %  |
| <i>Pbe</i> AcXE    | 97 %  | 87 %   | 97 %  | 94 %  | 66 %  | 95 % | 100 % |
| <i>Fre</i> AcXE    | 82 %  | 100 %  | 100 % | 71 %  | 58 %  | 48 % | 41 %  |
| <i>Aim</i> AcXE    | 100 % | 95 %   | 66 %  | 72 %  | 40 %  | 30 % | 7 %   |
| 40°C               | 0 min | 30 min | 1 h   | 2 h   | 4 h   | 6 h  | 24 h  |
| <i>Fsp</i> AcXE    | 77 %  | 100 %  | 59 %  | 64 %  | 55 %  | 45 % | 5 %   |
| <i>Fsp</i> F52AcXE | 82 %  | 77 %   | 62 %  | 100 % | 45 %  | 42 % | 14 %  |
| <i>Csp</i> AcXE    | 96 %  | 100 %  | 67 %  | 91 %  | 68 %  | 66 % | 70 %  |
| <i>Pbe</i> AcXE    | 78 %  | 75 %   | 68 %  | 62 %  | 100 % | 41 % | 57 %  |
| <i>Fre</i> AcXE    | 95 %  | 76 %   | 88 %  | 68 %  | 100 % | 29 % | 44 %  |
| <i>Aim</i> AcXE    | 100 % | 77 %   | 62 %  | 32 %  | 14 %  | 8 %  | 0 %   |

|                    |       |        |      |      |      |      |      |
|--------------------|-------|--------|------|------|------|------|------|
| 55°C               | 0 min | 30 min | 1 h  | 2 h  | 4 h  | 6 h  | 24 h |
| <i>Fsp</i> AcXE    | 100 % | 63 %   | 24 % | 15 % | 4 %  | 3 %  | 1 %  |
| <i>Fsp</i> F52AcXE | 100 % | 71 %   | 68 % | 69 % | 43 % | 37 % | 8 %  |
| <i>Csp</i> AcXE    | 100 % | 85 %   | 64 % | 49 % | 31 % | 32 % | 4 %  |
| <i>Pbe</i> AcXE    | 100 % | 85 %   | 83 % | 91 % | 60 % | 57 % | 29 % |
| <i>Fre</i> AcXE    | 100 % | 67 %   | 50 % | 15 % | 12 % | 10 % | 2 %  |
| <i>Aim</i> AcXE    | 100 % | 27 %   | 22 % | 1 %  | 0 %  | 1 %  | 1 %  |
| 70°C               | 0 min | 30 min | 1 h  | 2 h  | 4 h  | 6 h  | 24 h |
| <i>Fsp</i> AcXE    | 100 % | 0 %    | 0 %  | 0 %  | 0 %  | 0 %  | 0 %  |
| <i>Fsp</i> F52AcXE | 100 % | 0 %    | 0 %  | 0 %  | 0 %  | 0 %  | 0 %  |
| <i>Csp</i> AcXE    | 100 % | 0 %    | 0 %  | 0 %  | 0 %  | 0 %  | 0 %  |
| <i>Pbe</i> AcXE    | 100 % | 0 %    | 0 %  | 0 %  | 0 %  | 0 %  | 0 %  |
| <i>Fre</i> AcXE    | 100 % | 0 %    | 0 %  | 0 %  | 0 %  | 0 %  | 0 %  |
| <i>Aim</i> AcXE    | 100 % | 0 %    | 0 %  | 0 %  | 0 %  | 0 %  | 0 %  |

**Table S5.** X-ray crystallographic statistics.

| Structure                                   | PbeAcXE                  | PbeAcXE MeGlcA-<br>Xylp complex | PbeAcXE acetate<br>complex | CspAcXE               | FjoAcXE CBM           |
|---------------------------------------------|--------------------------|---------------------------------|----------------------------|-----------------------|-----------------------|
| PDB code                                    | 7TOG                     | 7TOH                            | 7TOI                       | 7TOJ                  | 7TOK                  |
| <b>Data collection</b>                      |                          |                                 |                            |                       |                       |
| Space group                                 | P2 <sub>1</sub>          | P2 <sub>1</sub>                 | P2 <sub>1</sub>            | C2                    | C222 <sub>1</sub>     |
| Cell dimensions                             |                          |                                 |                            |                       |                       |
| <i>a</i> , <i>b</i> , <i>c</i> (Å)          | 57.7, 42.6, 76.8         | 57.6, 42.8, 76.7                | 57.4, 42.6, 74.5           | 120.2, 77.3, 42.1     | 60.1, 120.1, 86.6     |
| $\alpha$ , $\beta$ , $\gamma$ , (°)         | 90, 108.3, 90            | 90, 108.4, 90                   | 90, 108.3, 90              | 90, 96.9, 90          | 90, 90, 90            |
| Resolution, Å                               | 28.78 – 1.35             | 28.53 – 1.26                    | 54.49 – 1.13               | 36.33 – 1.30          | 60.48 – 2.45          |
| $R_{\text{merge}}^a$                        | 0.106 (1.282)*           | 0.104 (1.467)                   | 0.116 (0.717)              | 0.067 (1.598)         | 0.054 (1.55)          |
| $R_{\text{pim}}^b$                          | 0.035 (0.515)            | 0.030 (0.583)                   | 0.023 (0.349)              | 0.022 (0.648)         | 0.026 (0.745)         |
| CC <sub>1/2</sub>                           | 0.997 (0.562)            | 0.998 (0.557)                   | 0.999 (0.657)              | 0.999 (0.536)         | 0.999 (0.519)         |
| <i>I</i> / $\sigma(I)$                      | 11.7 (1.4)               | 13.6 (1.2)                      | 17.5 (2.2)                 | 15.0 (1.2)            | 18.6 (0.8)            |
| Completeness, %                             | 99.5 (98.7)              | 97.4 (92.4)                     | 98.1 (91.7)                | 99.7 (99.5)           | 99.9 (100)            |
| Multiplicity                                | 8.9 (7.0)                | 11.8 (7.2)                      | 20.2 (5.1)                 | 9.4 (7.0)             | 4.8 (4.9)             |
| <b>Refinement</b>                           |                          |                                 |                            |                       |                       |
| Resolution, Å                               | 28.78 – 1.35             | 28.53 – 1.26                    | 54.45 – 1.13               | 35.36 – 1.30          | 43.32 – 2.45          |
| No. unique<br>reflections:<br>working, test | 77700, 3868              | 93456, 4701                     | 128849, 1997               | 93351, 4615           | 11916, 560            |
| $R_{\text{work}}/R_{\text{free}}^c$         | 15.0/18.0<br>(29.7/27.8) | 13.5/16.9 (26.0/28.4)           | 15.3/16.5 (25.1/28.9)      | 14.0/16.4 (29.5/32.4) | 23.0/28.4 (40.0/45.3) |
| No. atoms                                   |                          |                                 |                            |                       |                       |
| Protein                                     | 2955                     | 2964                            | 5962                       | 2861                  | 1979                  |
| Ligand                                      | N/A                      | 23                              | 7                          | N/A                   | N/A                   |
| Solvent                                     | N/A                      | N/A                             | N/A                        | 3                     | N/A                   |
| Water                                       | 656                      | 726                             | 708                        | 591                   | 10                    |
| <i>B</i> -factors                           |                          |                                 |                            |                       |                       |
| Protein                                     | 21.9                     | 20.2                            | 17.8                       | 26.0                  | 99.6                  |
| Ligand                                      | N/A                      | 26.8                            | 16.1                       | N/A                   | N/A                   |
| Solvent                                     | N/A                      | N/A                             | N/A                        | 20.7                  | N/A                   |
| Water                                       | 36.6                     | 36.7                            | 30.8                       | 41.1                  | 75.3                  |
| R.m.s. deviations                           |                          |                                 |                            |                       |                       |
| Bond lengths, Å                             | 0.017                    | 0.012                           | 0.013                      | 0.008                 | 0.004                 |
| Bond angles, °                              | 1.547                    | 1.373                           | 1.280                      | 1.072                 | 0.966                 |
| Ramachandran<br>plot                        |                          |                                 |                            |                       |                       |
| Favored, %                                  | 96.5                     | 97.6                            | 97.1                       | 97.2                  | 88.7                  |
| Allowed, %                                  | 3.5                      | 2.4                             | 2.9                        | 2.5                   | 10.5                  |
| Outliers, %                                 | 0                        | 0                               | 0                          | 0.3                   | 0.8                   |

\*All values in brackets refer to values in highest resolution shells.

<sup>a</sup> $R_{\text{merge}} = \sum_{\text{hkl}} \sum_j |I_{\text{hkl},j} - \langle I_{\text{hkl}} \rangle| / \sum_{\text{hkl}} \sum_j I_{\text{hkl},j}$ , where  $I_{\text{hkl},j}$  and  $\langle I_{\text{hkl}} \rangle$  are the *j*th and mean measurement of the intensity of reflection *j*.

<sup>b</sup> $R_{\text{pim}} = \sum_{\text{hkl}} \sqrt{(n/n-1) \sum_{j=1}^n |I_{\text{hkl},j} - \langle I_{\text{hkl}} \rangle|} / \sum_{\text{hkl}} \sum_j I_{\text{hkl},j}$

<sup>c</sup> $R_{\text{work}}$  or  $R_{\text{free}} = \sum |F_{\text{p}}^{\text{obs}} - F_{\text{p}}^{\text{calc}}| / \sum F_{\text{p}}^{\text{obs}}$ , where  $F_{\text{p}}^{\text{obs}}$  and  $F_{\text{p}}^{\text{calc}}$  are the observed and calculated structure factor amplitudes, respectively.

N/A = not applicable.

**Table S6.** Structural orthologs of PbeAcXE and CspAcXE from Dali search (full-length structures).

| PbeAcXE orthologs |                                                                                             |                                 |         |                          |                     |
|-------------------|---------------------------------------------------------------------------------------------|---------------------------------|---------|--------------------------|---------------------|
| PDB code          | Protein name                                                                                | Known or putative function      | Z-score | RMSD (Å over X Ca atoms) | Sequence identity % |
| 4rsh              | putative lipolytic protein of G-D-S-L family from <i>Desulfitobacterium hafniense</i> DCB-2 | Unknown                         | 22.3    | 1.9, 172                 | 21                  |
| 4rw0              | lipolytic protein G-D-S-L family from <i>Veillonella parvula</i> DSM 2008                   | Unknown                         | 20.9    | 2.2, 173                 | 24                  |
| 4jgg              | TesA from <i>Pseudomonas aeruginosa</i>                                                     | Thioesterase, lysophospholipase | 20.8    | 2.2, 175                 | 21                  |
| 4ppy              | putative acylhydrolase (BF3764) from <i>Bacteroides fragilis</i> NCTC 9343                  | Unknown                         | 20.2    | 2.7, 191                 | 22                  |
| 6nkd              | Lipase Lip_vut3 from Goat Rumen metagenome.                                                 | Lipase                          | 20.1    | 2.5, 186                 | 16                  |
| 1yzf              | lipase/acylhydrolase from <i>Enterococcus faecalis</i>                                      | Unknown                         | 20.0    | 2.5, 182                 | 22                  |
| 7ddy              | acetyl xylan esterase AlAXEase from <i>Arcticibacterium luteifluviistationis</i>            | acetyl xylan esterase           | 19.9    | 2.5, 177                 | 23                  |
| 5tic              | <i>E. coli</i> Acyl-CoA thioesterase I / TesA                                               | Thioesterase                    | 19.5    | 2.4, 171                 | 20                  |
| 4jko              | Axe2 (Axe2_S15A), an acetyl xylan esterase from <i>Geobacillus stearothermophilus</i>       | acetyl xylan esterase           | 19.2    | 2.7, 178                 | 20                  |
| 5b5s              | acetyl esterase CE3 from <i>Talaromyces cellulolyticus</i>                                  | CE3 acetyl esterase             | 18.2    | 2.1, 167                 | 19                  |
| 6uqz              | ChoE from <i>Pseudomonas aeruginosa</i> PAO1                                                | Acetylcholinesterase            | 17.4    | 2.8, 186                 | 15                  |
| 2waa              | CtCE2 from <i>Cellvibrio japonicus</i>                                                      | CE2 acetyl esterase             | 15.0    | 3.3, 194                 | 15                  |
| 3u37              | Est2A from <i>Butyrivibrio proteoclasticus</i> B316                                         | CE2 acetyl esterase             | 14.2    | 3.8, 205                 | 13                  |
| CspAcXE orthologs |                                                                                             |                                 |         |                          |                     |
| 4rsh              | putative lipolytic protein of G-D-S-L family from <i>Desulfitobacterium hafniense</i> DCB-2 | Unknown                         | 19.5    | 1.8, 156                 | 28                  |
| 1vjg              | gdsl-like lipase (alr1529) from <i>nostoc sp. pcc 7120</i>                                  | Unknown                         | 19.4    | 2.5, 178                 | 15                  |
| 7ddy              | acetyl xylan esterase AlAXEase from <i>Arcticibacterium luteifluviistationis</i>            | acetyl xylan esterase           | 18.6    | 2.5, 166                 | 21                  |
| 5tic              | <i>E. coli</i> Acyl-CoA thioesterase I / TesA                                               | Thioesterase                    | 18.6    | 2.5, 166                 | 16                  |

|      |                                                                                      |                                 |      |          |    |
|------|--------------------------------------------------------------------------------------|---------------------------------|------|----------|----|
| 4rw0 | lipolytic protein G-D-S-L family from <i>Veillonella parvula</i> DSM 2008            | Unknown                         | 18.4 | 2.2, 162 | 20 |
| 4jgg | TesA from <i>Pseudomonas aeruginosa</i>                                              | Thioesterase, lysophospholipase | 18.4 | 2.4, 163 | 22 |
| 4jko | Axe2 (Axe2_S15A), an acetylxytan esterase from <i>Geobacillus stearothermophilus</i> | acetylxytan esterase            | 17.7 | 2.7, 165 | 17 |
| 4ppy | putative acylhydrolase (BF3764) from <i>Bacteroides fragilis</i> NCTC 9343           | Unknown                         | 16.8 | 2.7, 168 | 23 |
| 5b5s | acetyl esterase CE3 from <i>Talaromyces cellulolyticus</i>                           | CE3 acetyl esterase             | 16.5 | 2.3, 160 | 18 |
| 6uqz | ChoE from <i>Pseudomonas aeruginosa</i> PAO1                                         | Acetylcholinesterase            | 15.7 | 2.6, 172 | 12 |
| 2waa | CtCE2 from <i>Cellvibrio japonicus</i>                                               | CE2 acetyl esterase             | 15.0 | 3.7, 193 | 11 |
| 3u37 | Est2A from <i>Butyrivibrio proteoclasticus</i> B316                                  | CE2 acetyl esterase             | 13.4 | 3.6, 187 | 14 |
